# Supplementary material for: The use of a sulfonium-based photoacid generator in thiol–ene photopolymers for the controlled activation of transesterification through chemical amplification
Source: Royal Society of Chemistry journal article supplement (doi:10.1039/d3py01106b), 2023-12-16
Supplement: d3py01106b1.pdf [file d3py01106b1.pdf]

## Supporting Information, ESI<sup>†</sup>

### The use of a sulfonium-based photoacid generator in thiol-ene photopolymers for the controlled activation of transesterification through chemical amplification

Walter Alabiso,<sup>a</sup> Yang Li,<sup>a</sup> Joost Brancart,<sup>b</sup> Guy Van Assche,<sup>b</sup> Elisabeth Rossegger\*<sup>a</sup> and Sandra Schlögl\*<sup>a</sup>

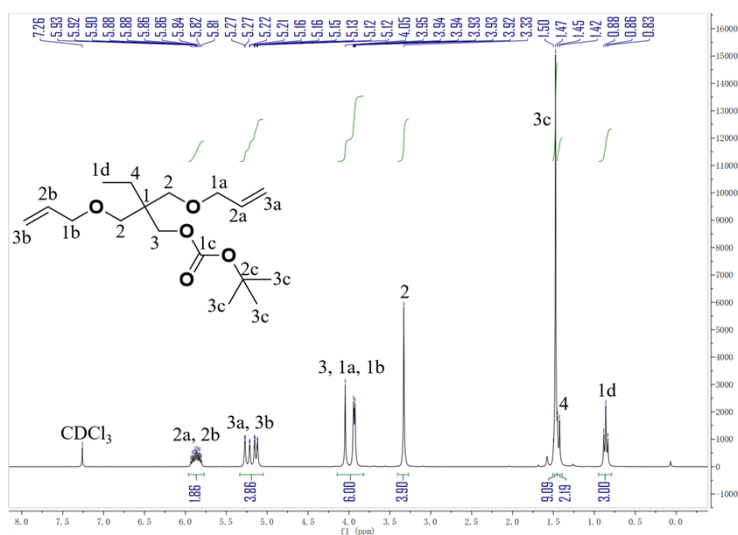

## 1. Supplementary Figures

Fig. S1 <sup>1</sup>H-NMR (300 MHz in CDCl<sub>3</sub> at 298 K) of BOC-TMPDE with the characteristic atoms labelled.

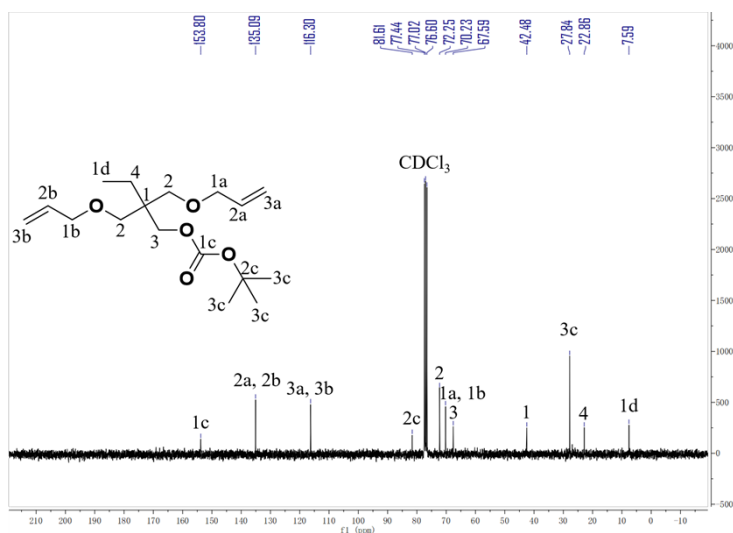

**Fig. S2**  $^{13}\text{C}$ -NMR (300 MHz in  $\text{CDCl}_3$  at 298 K) of BOC-TMPDE with the characteristic atoms labelled.

<sup>a</sup> Polymer Competence Center Leoben GmbH, Sauraugasse 1, A-8700 Leoben (Austria). E-mail: elisabeth.rossegger@pccl.at, sandra.schloegl@pccl.at  
<sup>b</sup> Vrije Universiteit Brussel (VUB), Pleinlaan 2, B-1050 Bruxelles, Belgium.

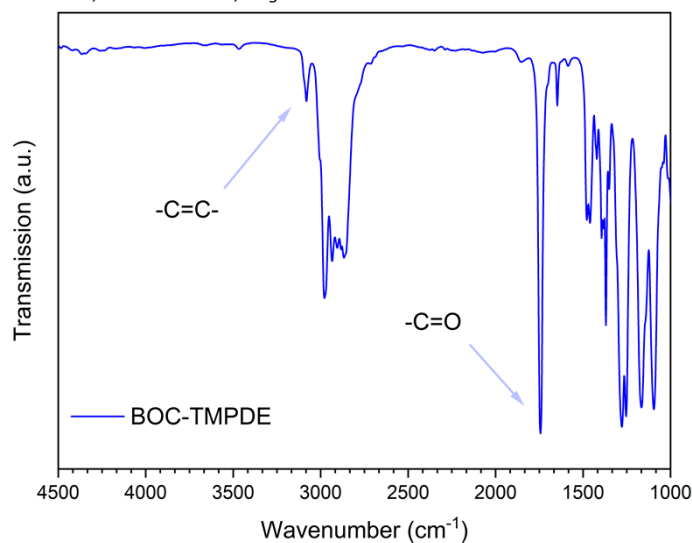

**Fig. S3** FTIR spectrum of BOC-TMPDE. The vinyl band at  $3082\text{ cm}^{-1}$  and carbonyl band at  $1743\text{ cm}^{-1}$  indicate the presence of the *t*-BOC protecting group grafted onto TMPDE.

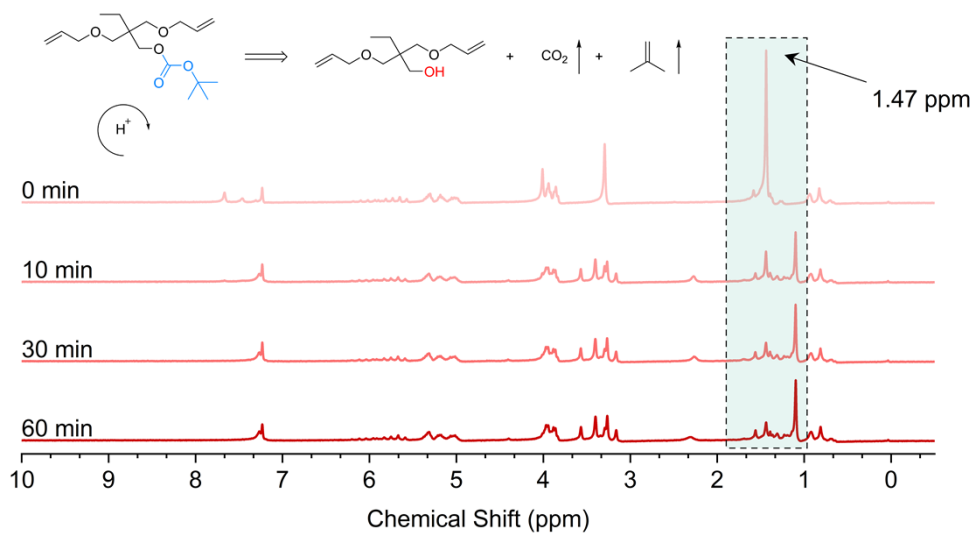

**Fig. S4** Deprotection reaction of BOC-TMPDE investigated with  $^1\text{H}$ -NMR at several irradiation times at  $365\text{ nm}$  ( $44.4\text{ mW cm}^{-2}$ ). The decrease in the peak at  $1.47\text{ ppm}$  is an indication of the progressive disappearance of the *t*-BOC group, as the activated acid promotes the cleavage reaction (described in the appended scheme).

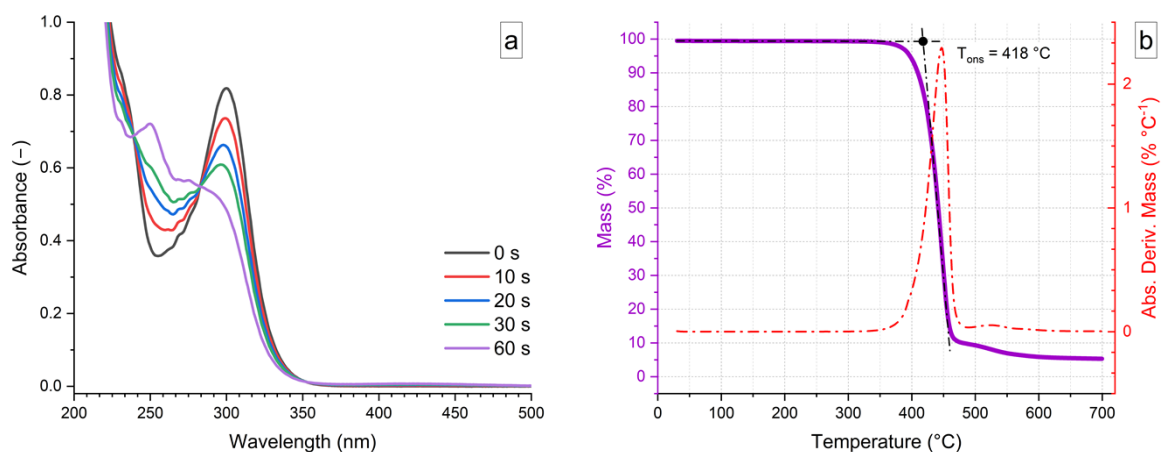

**Fig. S5** (a) UV-Vis spectra of the pure 4-phenylthiophenyl-diphenylsulfonium triflate (DPST) in acetonitrile (0.02 mg/mL). (b) TGA of DPST. The compound is thermally stable up to circa 400 °C.

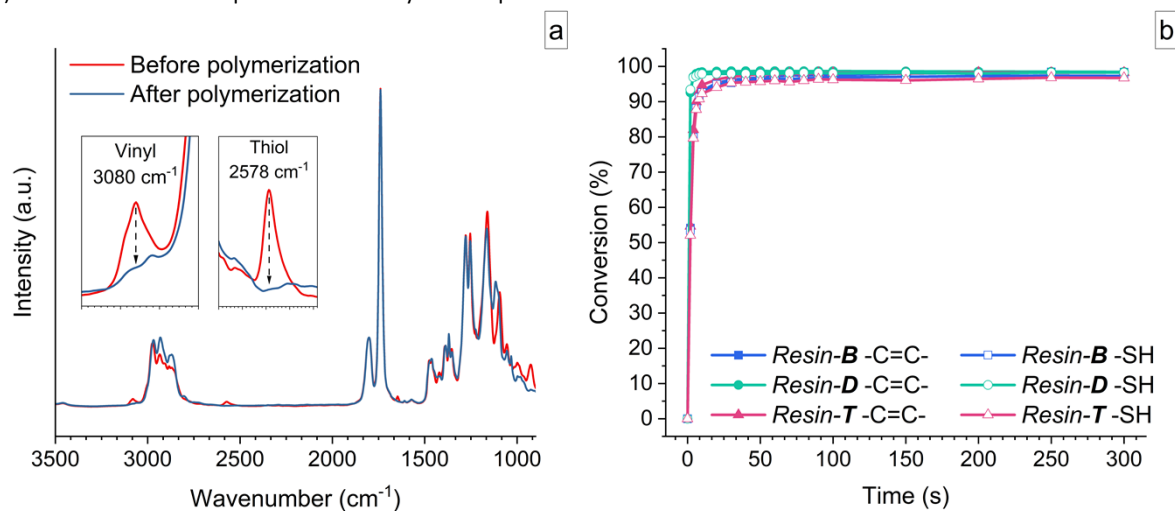

**Fig. S6** (a) FTIR-ATR spectra of *Resin-B* prior to and after polymerization. The insets magnify the regions of the stretching vibrations of vinyl  $-C=C-$  and the  $-SH$  thiol. (b) Curing kinetics and final monomer conversions of vinyl groups (full symbols) and thiol groups (open symbols) versus light exposure, as obtained from the change in intensity of the respective FTIR band.

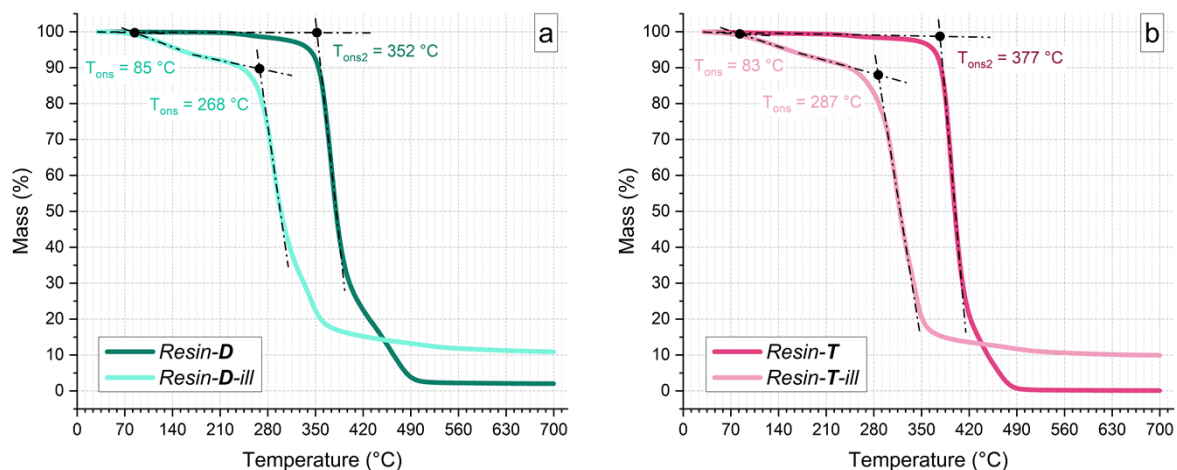

**Fig. S7** TGA curves of the reference systems used in this study prior to and after UV illumination. (a) *Resin-D*, (b) *Resin-T*. In both cases, the presence of the activated photoacid weakens the thermal stability of the polymer. However, this effect is much more pronounced in *Resin-D* due to the lack of  $-OH$  groups.

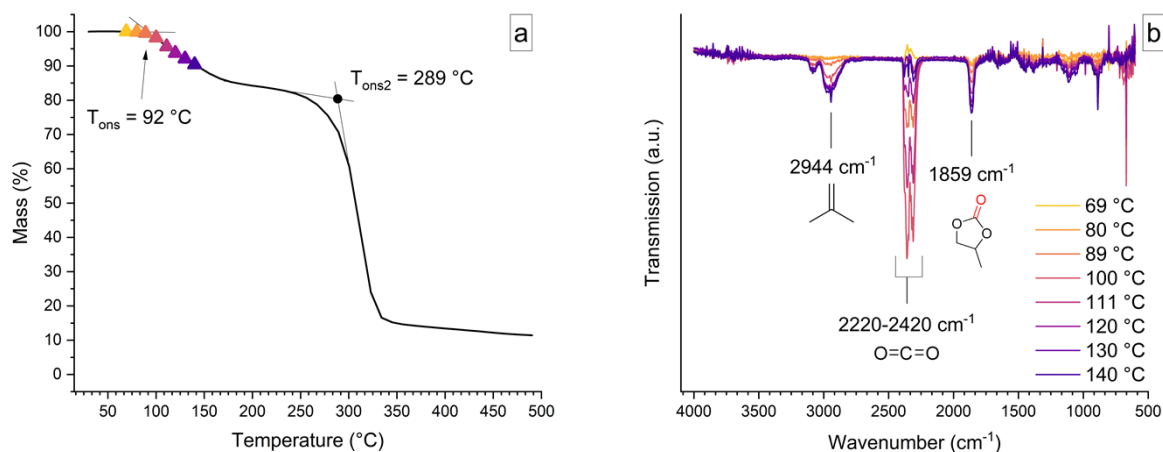

**Fig. S8** EGA of *Resin-B-non-ill*. (a) Mass loss (%) with a first visible step (92 °C onset of deprotection) and the main network degradation initiating at 289 °C. (b) FTIR-spectra of the gaseous phase acquired at several temperatures. The emission of CO<sub>2</sub> at 2220-2420 cm<sup>-1</sup> and isobutylene at 2944 cm<sup>-1</sup> signify that DPST is responsible for gradual deprotection even in its non-activated state. The peak at 1859 cm<sup>-1</sup> is ascribed to the stretching vibration of the -C=O group present in the solvent (PC).

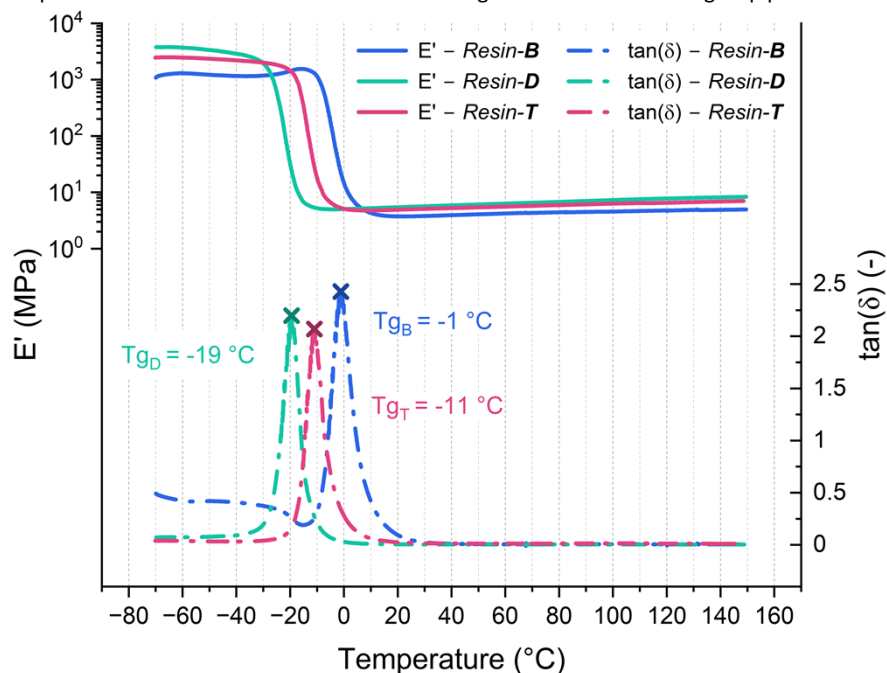

**Fig. S9** DMA plot for all the systems analysed in this study in the absence of the photoacid. It is clear that all characterisation experiments were performed above all three glass transition temperatures.

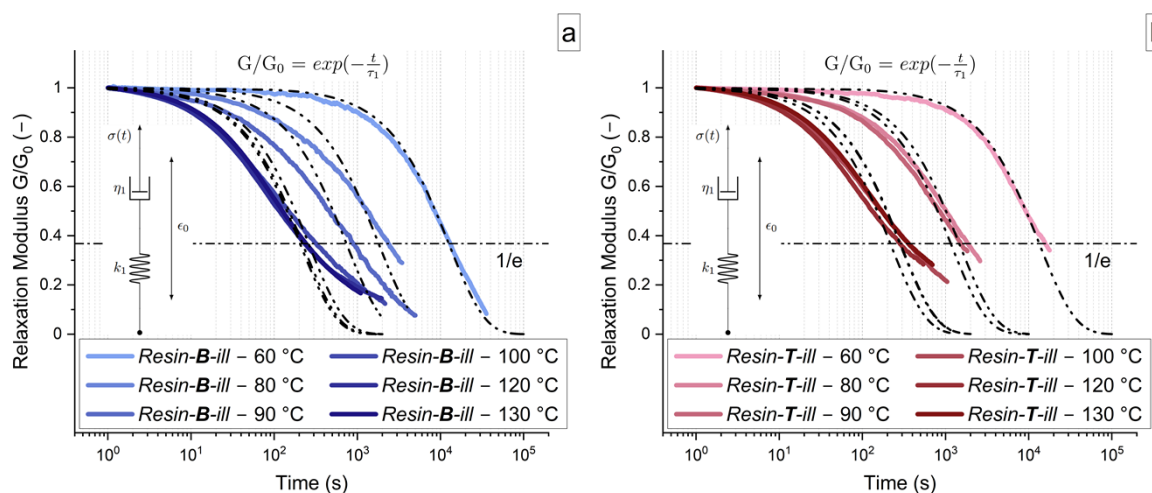

**Fig. S10** Rheometer measurements of *Resin-B-ill* and *Resin-T-ill* fitted with a single exponential equation and its equivalent Maxwell viscoelastic model. (a) Stress relaxation curves of *Resin-B-ill* at different temperatures between 60 °C and 130 °C. (b) Stress relaxation curves of *Resin-T-ill* at different temperatures between 60 °C and 130 °C. The overall goodness of the fit is really poor, which justifies the use of a double Maxwell model, as described in the paper. The fitting equation acceptably matches only the curves at 60 °C ( $R^2 > 0.989$ ).

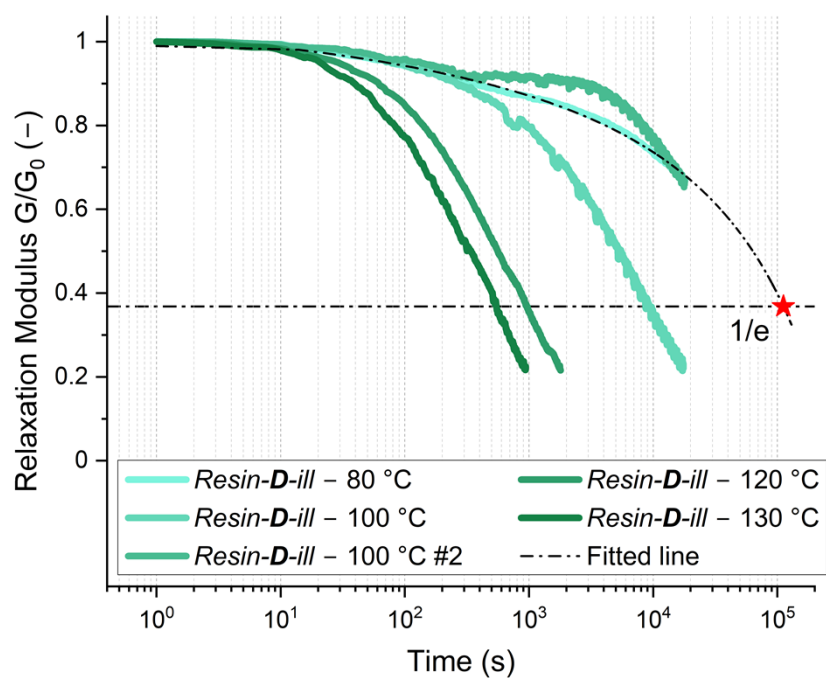

**Fig. S11** Rheometer measurements of *Resin-D-ill*. All samples treated above 100 °C were able to cross the relaxation threshold. The relaxation time of the curve measured at 80 °C was extrapolated via fitting in order to construct an Arrhenius plot (details in Section 2 of ESI<sup>†</sup>). The sample at 100 °C was measured twice and it showed an inconsistent performance (*Resin-D-ill* – 100 °C vs. *Resin-D-ill* – 100 °C #2).

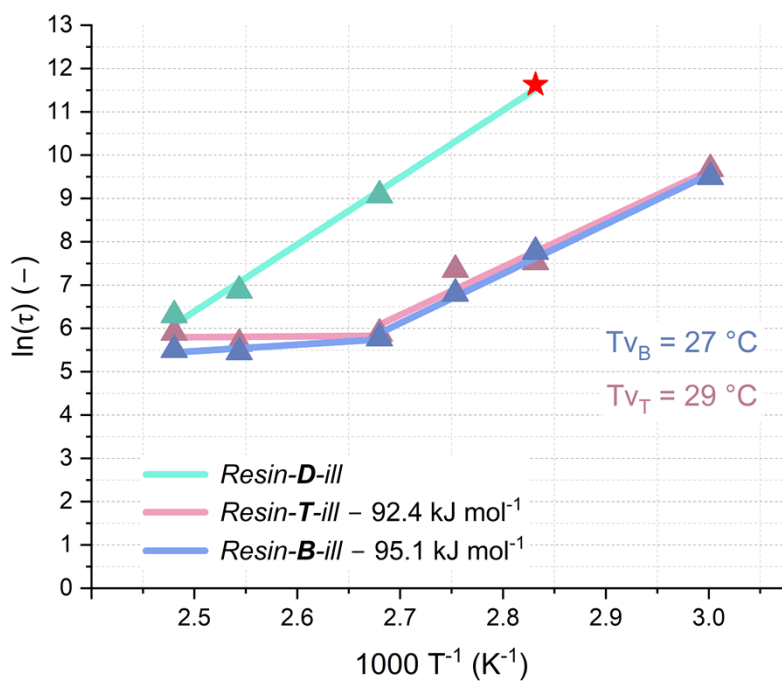

**Fig. S12** Complete Arrhenius plot of the illuminated Resin-**D**, -**T** and -**B**. While the latter two show a corner point (description in the main article), the former fits a linear behaviour.

## 2. Fitting and Calculations

### Modelling the kinetics of stress relaxation with a double Maxwell model

As described in the paper (Fig. 7), *Resin-B-ill* and *Resin-T-ill* have been modelled following a double Maxwell viscoelastic model, described by the superposition of two phenomena that decay exponentially. The equation used (1.2 in the main text) is presented here once again:

$$G/G_0 = a \cdot e^{-t/\tau_1} + (1-a) \cdot e^{-t/\tau_2} \quad (1.2)$$

Table S1 and S2 below collect all the fitting parameters determined for the rheometer measurements performed on *Resin-B-ill* and *Resin-T-ill*.

**Table S1** Fitting parameters calculated to fit the double Maxwell model to the rheometer experiments on *Resin-B-ill*.

| Parameter          | Description<br>(unit of measurement)                                                         | 60 °C  | 80 °C  | 90 °C  | 100 °C | 120 °C | 130 °C |
|--------------------|----------------------------------------------------------------------------------------------|--------|--------|--------|--------|--------|--------|
| $a$                | Normalised weight parameter<br>( )                                                           | 0.9114 | 0.7994 | 0.6320 | 0.4865 | 0.3952 | 0.4530 |
| $\tau_1$           | Time constant 1 (s)                                                                          | 14721  | 2999   | 1816   | 1213   | 1447   | 936    |
| $\tau_2$           | Time constant 2 (s)                                                                          | 1575   | 138    | 125    | 63     | 69     | 71     |
| $\tau_1/\tau_2$    | Ratio. Determines the gap in magnitude<br>( )                                                | 9.3    | 21.7   | 14.5   | 19.4   | 21.0   | 13.2   |
| $\tau_{eff}$       | Effective relaxation time<br>(s)                                                             | 13288  | 2366   | 898    | 321    | 233    | 245    |
| $R^2$              | Goodness of fit ( )                                                                          | 0.9992 | 0.9981 | 0.9972 | 0.9971 | 0.9977 | 0.9992 |
| $err_{\tau_1}$     | Relative error with respect to the equation when $\tau_1$ is used as effective time (%)      | +8.86  | +20.06 | +36.80 | +51.35 | +60.48 | +54.70 |
| $err_{\tau_{eff}}$ | Relative error with respect to the equation when $\tau_{eff}$ is used as effective time* (%) | -0.47  | +1.26  | -4.88  | -2.33  | +2.89  | +0.62  |

\*  $\tau_{eff}$  was defined in the paper as the time at which the normalised shear modulus of the measured curves reaches 1/e.

It's immediately clear that  $\tau_1 \gg \tau_2$  and that the fits are excellent ( $R^2 > 0.9960$ , counting the results from Table S2). By substituting both  $\tau_1$  and  $\tau_{eff}$  in equation (1.2) one can calculate the relative error as a deviation from the modulus value 1/e. This justifies the validity of the model in predicting when the curves cross this threshold. However, by substituting  $\tau_1$  in (1.2), the curves are far from the relaxation threshold 1/e predicted by a single Maxwell model (a single time constant). This means that  $\tau_1$  is not a good candidate for the choice of the effective time  $\tau_{eff}$  for the subsequent Arrhenius-Rouse model, but it would rather represent an upper bound (all relative errors are positive and much greater than 1). Conversely, determining  $\tau_{eff}$  by the experimental curves as the value at which the normalised shear modulus crosses 1/e takes  $\tau_2$  into account as well.

**Table S2** Fitting parameters calculated to fit the double Maxwell model to the rheometer experiments on *Resin-T-ill*.

| Parameter          | Description<br>(unit of measurement)                                                         | 60 °C  | 80 °C  | 90 °C  | 100 °C | 120 °C | 130 °C |
|--------------------|----------------------------------------------------------------------------------------------|--------|--------|--------|--------|--------|--------|
| $a$                | Normalised weight parameter ( )                                                              | 0.9747 | 0.7539 | 0.7705 | 0.5599 | 0.5422 | 0.5365 |
| $\tau_1$           | Time constant 1 (s)                                                                          | 14431  | 2591   | 2028   | 930    | 762    | 997    |
| $\tau_2$           | Time constant 2 (s)                                                                          | 49     | 224    | 171    | 60     | 55     | 72     |
| $\tau_1/\tau_2$    | Ratio. Determines the gap in magnitude ( )                                                   | 294.4  | 11.6   | 11.8   | 15.4   | 13.9   | 13.8   |
| $\tau_{eff}$       | Effective relaxation time (s)                                                                | 15972  | 1862   | 1560   | 356    | 283    | 365    |
| R <sup>2</sup>     | Goodness of fit ( )                                                                          | 0.9961 | 0.9978 | 0.9982 | 0.9986 | 0.9994 | 0.9995 |
| $err_{\tau_1}$     | Relative error with respect to the equation when $\tau_1$ is used as effective time (%)      | +2.53  | +24.61 | +22.95 | +44.01 | +45.78 | +46.35 |
| $err_{\tau_{eff}}$ | Relative error with respect to the equation when $\tau_{eff}$ is used as effective time* (%) | +12.40 | +0.11  | +2.95  | -4.06  | -2.33  | -1.96  |

For completeness, the parameters deriving from fitting a single exponential Maxwell model (equation and results in Fig. S10) are listed in Table S3 below.

**Table S3** Fitting parameters calculated to fit the single Maxwell model to the rheometer experiments on *Resin-B-ill* and *Resin-T-ill*. Equation and results in Fig. S10.

| Parameter          | Description<br>(unit of measurement) | 60 °C  | 80 °C  | 90 °C  | 100 °C | 120 °C | 130 °C |
|--------------------|--------------------------------------|--------|--------|--------|--------|--------|--------|
| <i>Resin-B-ill</i> |                                      |        |        |        |        |        |        |
| $\tau_1$           | Time constant 1 (s)                  | 12587  | 1806   | 740    | 260    | 205    | 219    |
| R <sup>2</sup>     | Goodness of fit ( )                  | 0.9950 | 0.9208 | 0.9344 | 0.8782 | 0.8886 | 0.9159 |
| <i>Resin-T-ill</i> |                                      |        |        |        |        |        |        |
| $\tau_1$           | Time constant 1 (s)                  | 13407  | 1462   | 1156   | 287    | 217    | 282    |
| R <sup>2</sup>     | Goodness of fit ( )                  | 0.9891 | 0.9498 | 0.9499 | 0.8804 | 0.8972 | 0.9027 |

## Fitting of the viscoelastic flow kinetics via a Arrhenius-Rouse model

The Arrhenius plots (Fig. 8 in the main text) were fitted in Matlab 2022a with the curve fitting environment activated by the command “cftool”. The method used was “NonlinearLeastSquares”, “Robust: off”, “Algorithm: Trust-region”.

To reproduce equation 3 in the main text (below on the left-hand side), the following custom equation (right-hand side) was given as a fitting model:

$$\ln(\tau) = \ln \left( \frac{1}{A_{AR} \cdot C^b \exp\left(-\frac{E_a}{RT}\right)} + \frac{1}{A_{RO} \cdot C^{2/3} \cdot T} \right) \quad \longrightarrow \quad y(x) = \ln \left( \frac{1}{a \cdot C^b \cdot \exp(-d \cdot x)} + \frac{x}{f \cdot C^{2/3}} \right)$$

Where  $y$  corresponds to  $\ln(\tau)$ , while  $x$  replaced  $1/T$  for simplicity. The results obtained from the curve fitting session using  $\tau_{eff}$  are collected in Table S4 below.

**Table S4** Curve fitting results for the Arrhenius plots of *Resin-B-ill* and *Resin-T-ill*.

| Physical quantity | Physical meaning (unit of measurement)                                                     | Corresponding symbol | Value ( <i>Resin-B-ill</i> ) | Value ( <i>Resin-T-ill</i> ) |
|-------------------|--------------------------------------------------------------------------------------------|----------------------|------------------------------|------------------------------|
| $A_{AR}$          | Characteristic constant in the Arrhenius regime (transesterification-limited) ( $s^{-1}$ ) | a                    | 11.34                        | 16.27                        |
| C                 | Catalyst concentration <sup>[a]</sup> ( )                                                  | C                    | 12.39                        | 10.01                        |
| b                 | Exponent of C ( )                                                                          | b                    | 10.53                        | 11.29                        |
| $E_a/R$           | Activation energy over gas constant (slope of Arrhenius line) (K)                          | d                    | 12.83                        | 12.82                        |
| $A_{RO}$          | Characteristic constant in the Rouse regime (diffusion-limited) ( $s^{-1} K^{-1}$ )        | f                    | $2.36 \cdot 10^{-3}$         | $1.96 \cdot 10^{-3}$         |

[a] According to Hubbard et al.<sup>[1]</sup>

## Fitting of the curve “*Resin-D-ill* – 80 °C” in Fig. S11

The curve “*Resin-D-ill* – 80 °C” was fitted in Matlab 2022a with the curve fitting environment activated by the command “cftool”. The method used was “NonlinearLeastSquares”, “Robust: off”, “Algorithm: Trust-region”.

The following function was implemented:

$$y(w) = \frac{p_1 \cdot w^3 + p_2 w^2 + p_3 w + p_4}{w^4 + q_1 w^3 + q_2 w^2 + q_3 w + q_4} \quad ; \quad w = \ln(x)$$

and the following parameters were calculated to yield a fitting curve with  $R^2 = 0.827$ :

$$\begin{aligned} p_1 &= -2224 \\ p_2 &= 3.001 \cdot 10^4 \\ p_3 &= -2.605 \cdot 10^4 \\ p_4 &= -6127 \\ q_1 &= -1894 \\ q_2 &= 2.92 \cdot 10^4 \end{aligned}$$



$$\begin{aligned} q_3 &= -2.551 \cdot 10^4 \\ q_4 &= -6191 \end{aligned}$$

## Calculation of the topological freezing transition temperature ( $T_v$ )

The topological freezing transition temperature ( $T_v$ ) was calculated according to the standard procedure in literature, presented in detail below. From the DMA curves, the average value of the storage Young's modulus ( $E'$ ) for *Resin-B* and  $-T$  was taken. Here, as an example, the mathematical procedure for the estimation of  $T_v$  in *Resin-B* is illustrated below. Assuming incompressibility (Poisson's ratio  $\nu = 0.5$ ) and by exploiting the relation between Young's modulus and shear modulus ( $G'$ ) for elastic linear homogeneous isotropic materials, it follows that:

$$G' = \frac{E'}{2(1+\nu)} = \frac{4.564 \text{ MPa}}{2(1+0.5)} = 1.521 \text{ MPa}$$

The extrapolated relaxation time  $\tau^*$  according to Maxwell's model was then obtained, assuming that at  $T = T_v$ , the viscosity  $\eta = 1 \cdot 10^{12}$  Pa·s:

$$\tau^* = \eta / G' = \frac{10^{12} \text{ Pa} \cdot \text{s}}{1.521 \cdot 10^6 \text{ Pa}} = 6.573 \cdot 10^5 \text{ s}$$

$T_v$  can then be extracted from the Arrhenius equation as follows:

$$\ln(\tau^*) = \frac{E_a}{RT_v} + c = \frac{E}{R} \cdot \frac{1000}{T_v} + c \quad ; \quad y = m \cdot x + c$$

$E/R$  and  $c$  are the slope and the y-intercept of the straight line (*i.e.* Arrhenius plot), respectively. After some additional steps, one can calculate the  $T_v$ :

$$\frac{1000}{T_v} = \frac{\ln(\tau^*) - c}{m} = \frac{13.40 - (-24.77)}{11.44} = 3.337 \text{ K}^{-1} \quad \Rightarrow \quad T_v = \frac{1000}{3.337} - 273.15 = 26.5 \text{ }^\circ\text{C}$$

And the activation energy is:

$$E_a = 1000 \cdot E = 1000 \cdot m \cdot R = 1000 \cdot 11.44 \text{ K} \cdot 8.314 \text{ J mol}^{-1} \text{ K}^{-1} = 95.1 \text{ kJ mol}^{-1}$$

### 3. References

- [1] A. M. Hubbard, Y. Ren, D. Konkolewicz, A. Sarvestani, C. R. Picu, G. S. Kedziora, A. Roy, V. Varshney and D. Nepal, *ACS Appl. Polym. Mater.*, 2021, **3**, 1756-1766.
